# Supplementary material
Source: MDPI journal article supplement (https://www.mdpi.com/2073-445X/11/8/1149)
Supplement: s1 [file s1]

Table S1. List of main data used in this study.

| Data type                                 | Specific data                                                                                                        | Data source                                                                                                                                                      | Data usage                                                                          |
|-------------------------------------------|----------------------------------------------------------------------------------------------------------------------|------------------------------------------------------------------------------------------------------------------------------------------------------------------|-------------------------------------------------------------------------------------|
| Meteorological data (2018)                | Temperature, precipitation, air pressure, relative humidity, wind speed and sunshine duration                        | National Meteorological Science Data Center<br>( <a href="http://www.nmic.cn/">http://www.nmic.cn/</a> )                                                         | Calculation for photosynthesis-, light temperature-, climate potential productivity |
|                                           | Solar radiation data                                                                                                 | Geographic Remote Sensing Ecological Network Platform( <a href="http://www.gisrs.cn/">http://www.gisrs.cn/</a> )                                                 |                                                                                     |
| Soil Type                                 | Soil texture, pH, organic carbon, total exchangeable bases(TEB), carbon exchange capacity (CEC), base saturation(BS) | Resource Environmental Science and Data Center, Chinese Academy of Sciences<br>( <a href="http://www.resdc.cn/Default.asp">http://www.resdc.cn/Default.asp</a> ) | Calculation for land potential productivity                                         |
| Basic geographic information data in 2018 | Land use data                                                                                                        | Resource Environmental Science and Data Center, Chinese Academy of Sciences<br>( <a href="http://www.resdc.cn/Default.asp">http://www.resdc.cn/Default.asp</a> ) | Types and distribution of farmland                                                  |
|                                           | Administrative division data for counties and townships                                                              |                                                                                                                                                                  | Visualization of farmer's behavior correction coefficient                           |
| Statistics data (2018)                    | Actual grain yield                                                                                                   | Yuanjiang Statistics Bureau                                                                                                                                      | Reliability verification of model estimated results                                 |
|                                           | Population                                                                                                           |                                                                                                                                                                  |                                                                                     |
|                                           | Crop sown area                                                                                                       |                                                                                                                                                                  |                                                                                     |
| Farms' behavior (2018)                    | Characteristics of farmer and family                                                                                 | Questionnaire                                                                                                                                                    | Farmers' behavior correction coefficient                                            |
|                                           | Production substances input                                                                                          |                                                                                                                                                                  |                                                                                     |
|                                           | Agricultural technical trainings                                                                                     |                                                                                                                                                                  |                                                                                     |
|                                           | Farmers' willingness to plant grain crops                                                                            |                                                                                                                                                                  |                                                                                     |

**Table S2.** Comparison of the actual correction coefficient of sample point and the coefficient obtained by interpolation method

| Sample Number           | Corresponding Village | Fertilization Correction Coefficient |        | Comprehensive Factor Correction Coefficient |        |
|-------------------------|-----------------------|--------------------------------------|--------|---------------------------------------------|--------|
|                         |                       | Interpolation                        | Actual | Interpolation                               | Actual |
| 1                       | Huaguoshan            | 0.99                                 | 0.96   | 0.72                                        | 0.70   |
| 2                       | Xinwan                | 0.88                                 | 0.90   | 0.67                                        | 0.69   |
| 3                       | Yuzhu                 | 1.00                                 | 1.06   | 0.73                                        | 0.77   |
| 4                       | Zhufeng               | 0.70                                 | 0.75   | 0.51                                        | 0.63   |
| 5                       | Donghe                | 0.78                                 | 0.83   | 0.56                                        | 0.50   |
| 6                       | Beixiang              | 0.98                                 | 0.95   | 0.71                                        | 0.75   |
| 7                       | Huangmaozhou          | 0.81                                 | 0.79   | 0.59                                        | 0.66   |
| 8                       | Baxingcha             | 0.93                                 | 0.90   | 0.67                                        | 0.69   |
| 9                       | Huying                | 0.95                                 | 0.96   | 0.69                                        | 0.70   |
| 10                      | Zimucheng             | 0.86                                 | 0.88   | 0.63                                        | 0.61   |
| 11                      | Lishan                | 1.11                                 | 1.04   | 0.73                                        | 0.69   |
| 12                      | Mupinghubei           | 1.14                                 | 1.02   | 0.74                                        | 0.71   |
| 13                      | Fuan                  | 1.00                                 | 0.91   | 0.67                                        | 0.68   |
| 14                      | Niuzhou               | 0.97                                 | 0.89   | 0.69                                        | 0.70   |
| 15                      | Fumin                 | 0.89                                 | 0.80   | 0.66                                        | 0.65   |
| 16                      | Shengtian             | 0.99                                 | 1.05   | 0.65                                        | 0.64   |
| 17                      | Shangmatou            | 1.01                                 | 0.96   | 0.64                                        | 0.61   |
| 18                      | Yuejin                | 0.84                                 | 0.79   | 0.72                                        | 0.77   |
| 19                      | Xingfu                | 1.00                                 | 0.88   | 0.73                                        | 0.72   |
| 20                      | Dadongkou             | 0.87                                 | 0.91   | 0.63                                        | 0.60   |
| 21                      | Yuque                 | 1.08                                 | 1.04   | 0.72                                        | 0.67   |
| Correlation Coefficient |                       | 0.85                                 |        | 0.75                                        |        |
